# Supplementary material for: In Vitro Activity of Selected Phenolic Compounds against Planktonic and Biofilm Cells of Food-Contaminating Yeasts
Source: MDPI journal article supplement (doi:10.3390/foods10071652), 2021-07-17
Supplement: s1 [file s1]

## Supplementary material

### ***In vitro* activity of selected phenolic compounds against planktonic and biofilm cells of food-contaminating yeasts**

Bernard Gitura Kimani <sup>1</sup>, Erika Beáta Kerekes <sup>1</sup>, Csilla Szebenyi <sup>1,2</sup>, Judit Krisch <sup>3</sup>, Csaba Vágvolgyi <sup>1</sup>, Tamás Papp <sup>1,2</sup> and Miklós Takó <sup>1,\*</sup>

<sup>1</sup> Department of Microbiology, Faculty of Science and Informatics, University of Szeged, Közép fasor 52, H-6726 Szeged, Hungary

<sup>2</sup> MTA-SZTE “Lendület” Fungal Pathogenicity Mechanisms Research Group, University of Szeged, Közép fasor 52, H-6726 Szeged, Hungary

<sup>3</sup> Institute of Food Engineering, Faculty of Engineering, University of Szeged, Mars tér 7, H-6724 Szeged, Hungary

\*Correspondence: tako78@bio.u-szeged.hu; Tel.: +36-62-544-516

## List of figures

**Figure S1.** Effect of phenolic compounds on the growth of *D. hansenii* SZMC 8045Mo (A), *P. anomala* SZMC 8061Mo (B), *S. pombe* SZMC 1280 (C) and *S. cerevisiae* SZMC 1279 (D) at a concentration of 1 mg/mL.

**Figure S2.** Effect of phenolic compounds on the growth of *D. hansenii* SZMC 8045Mo (A), *P. anomala* SZMC 8061Mo (B), *S. pombe* SZMC 1280 (C) and *S. cerevisiae* SZMC 1279 (D) at a concentration of 500 µg/mL.

**Figure S3.** Effect of phenolic compounds on the growth of *D. hansenii* SZMC 8045Mo (A), *P. anomala* SZMC 8061Mo (B), *S. pombe* SZMC 1280 (C) and *S. cerevisiae* SZMC 1279 (D) at a concentration of 250 µg/mL.

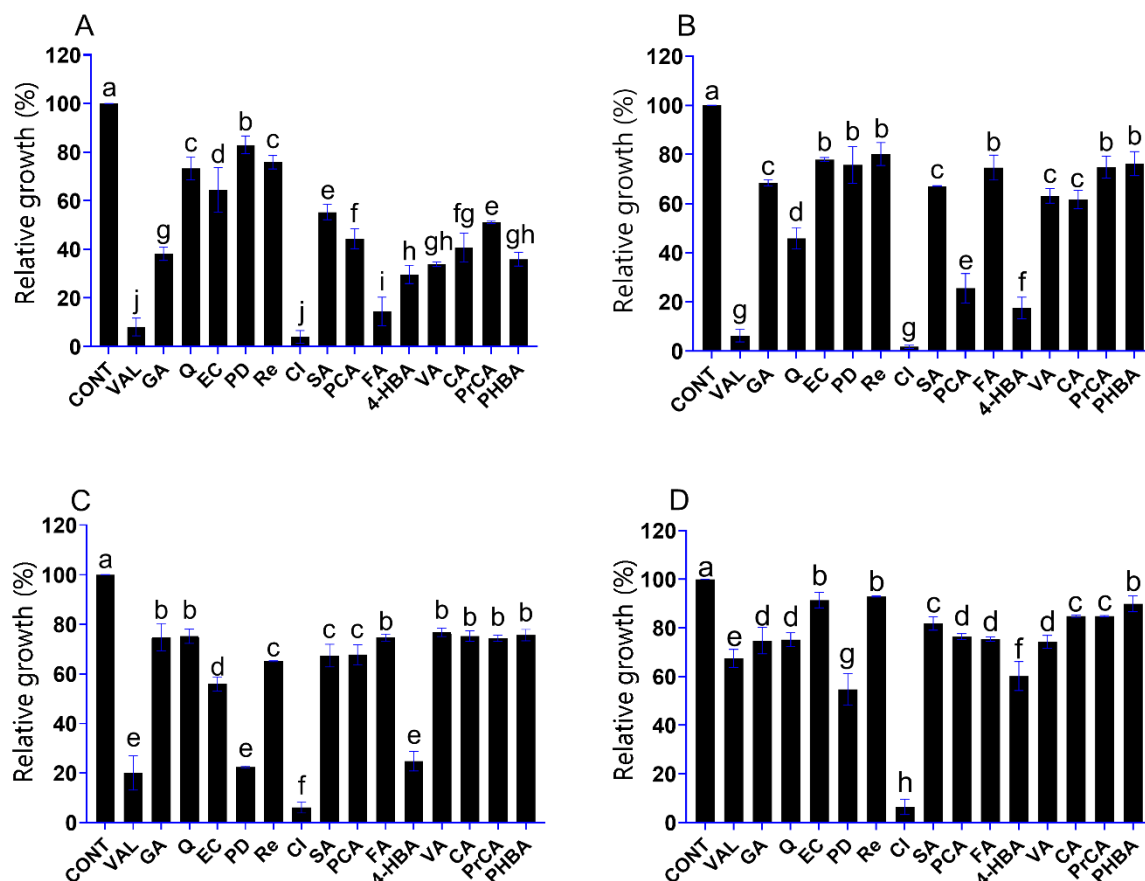

**Figure S1.** Effect of phenolic compounds on the growth of *D. hansenii* SZMC 8045Mo (A), *P. anomala* SZMC 8061Mo (B), *S. pombe* SZMC 1280 (C) and *S. cerevisiae* SZMC 1279 (D) at a concentration of 1 mg/mL. Phenolic compounds: vanillin (VAL), gallic acid (GA), quercetin (Q), (–)-epicatechin (EC), polydatin (PD), resveratrol (Re), cinnamic acid (CI), syringic acid (SA), *p*-coumaric acid (PCA), ferulic acid (FA), 4-hydroxybenzaldehyde (4-HBA), vanillic acid (VA), caffeic acid (CA), protocatechuic acid (PrCA), 4-hydroxybenzoic acid (PHBA). The control (CONT) represents the growth of yeasts in the absence of phenolic compounds. Presented results are averages of three biological and three technical replicates; error bars represent standard deviations. Different letters indicate statistical differences according to one-way ANOVA followed by Tukey's multiple comparison test ( $p < 0.05$ ).

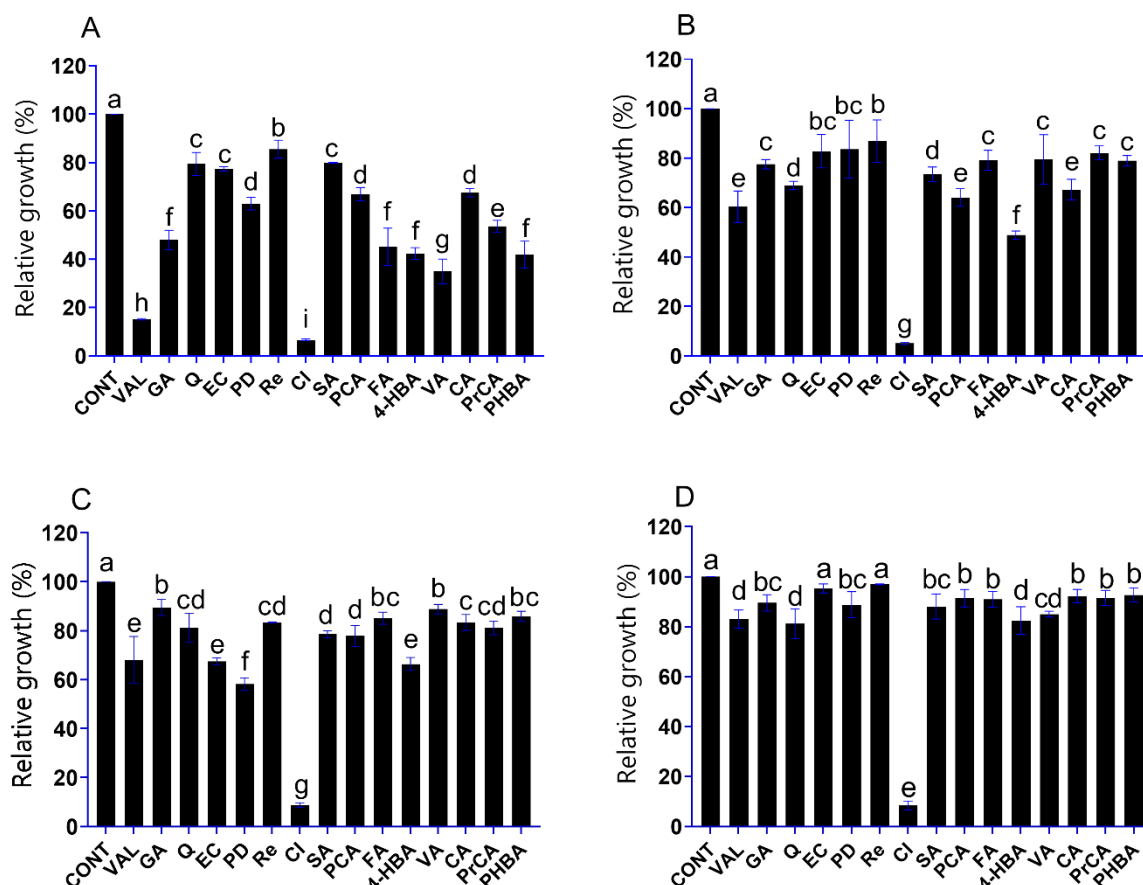

**Figure S2.** Effect of phenolic compounds on the growth of *D. hansenii* SZMC 8045Mo (A), *P. anomala* SZMC 8061Mo (B), *S. pombe* SZMC 1280 (C) and *S. cerevisiae* SZMC 1279 (D) at a concentration of 500 µg/mL. Phenolic compounds: vanillin (VAL), gallic acid (GA), quercetin (Q), (–)-epicatechin (EC), polydatin (PD), resveratrol (Re), cinnamic acid (CI), syringic acid (SA), *p*-coumaric acid (PCA), ferulic acid (FA), 4-hydroxybenzaldehyde (4-HBA), vanillic acid (VA), caffeic acid (CA), protocatechuic acid (PrCA), 4-hydroxybenzoic acid (PHBA). The control (CONT) represents the growth of yeasts in the absence of phenolic compounds. Presented results are averages of three biological and three technical replicates; error bars represent standard deviations. Different letters indicate statistical differences according to one-way ANOVA followed by Tukey's multiple comparison test ( $p < 0.05$ ).

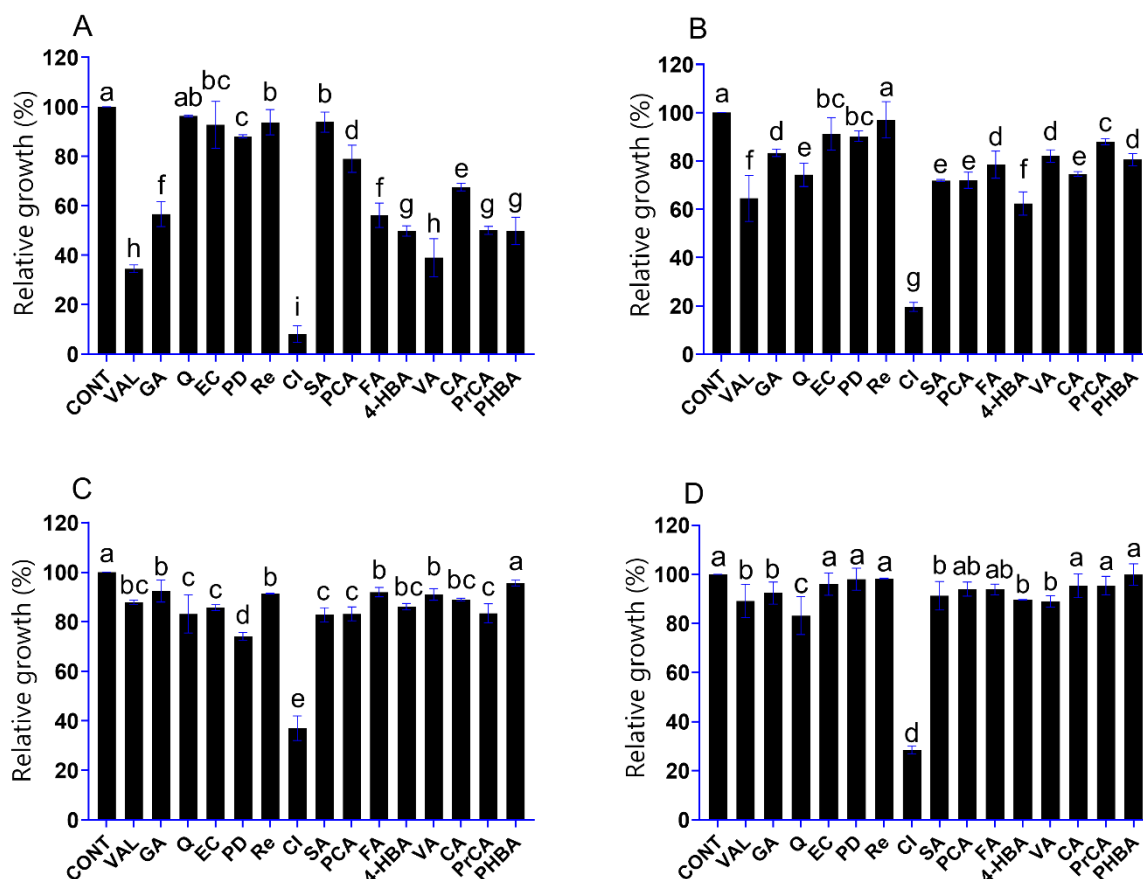

**Figure S3.** Effect of phenolic compounds on the growth of *D. hansenii* SZMC 8045Mo (A), *P. anomala* SZMC 8061Mo (B), *S. pombe* SZMC 1280 (C) and *S. cerevisiae* SZMC 1279 (D) at a concentration of 250 µg/mL. Phenolic compounds: vanillin (VAL), gallic acid (GA), quercetin (Q), (–)-epicatechin (EC), polydatin (PD), resveratrol (Re), cinnamic acid (CI), syringic acid (SA), *p*-coumaric acid (PCA), ferulic acid (FA), 4-hydroxybenzaldehyde (4-HBA), vanillic acid (VA), caffeic acid (CA), protocatechuic acid (PrCA), 4-hydroxybenzoic acid (PHBA). The control (CONT) represents the growth of yeasts in the absence of phenolic compounds. Presented results are averages of three biological and three technical replicates; error bars represent standard deviations. Different letters indicate statistical differences according to one-way ANOVA followed by Tukey's multiple comparison test ( $p < 0.05$ ).
